# Supplementary material
Source: publisher figshare collection journal article supplement (https://gsapubs.figshare.com/ndownloader/files/22409475)
Supplement: Supplementary file 1 [file 22409475]

## Sheet: Table S1
Searle,, M.P., Waters, D.J., Garber, J.M., Rioux, M., Cherry, A.G., and Ambrose, T.K., 2015, Structure and metamorphism beneath the obducting Oman ophiolite: Evidence from the Bani Hamid granulites, northern Oman mountains: Geosphere, v. 11, doi:10.1130/GES01199.1.
Supplemental Table 1. ID-TIMS U-Pb zircon data
	Composition					Isotopic Ratios																	Dates
									Uncorrected								Th-corrected (Th/Umelt = 2.63 ± 0.90)						Uncorrected							Th-corrected (Th/Umelt = 2.63 ± 0.90)
	Pb*/b	Pb*c	Pbcc	Th/d		206Pb/e	208Pb/f		206Pb*/f	2σ	207Pb*/f	2σ	207Pb*/f	2σ	corr.g		206Pb*/f	2σ	207Pb*/f	2σ	corr.g		206Pb/h	2σ	207Pb/h	2σ	207Pb/h	2σ		206Pb/h	2σ	207Pb/h	2σ
	Pbc	(pg)	(pg)	U		204Pb	206Pb		238U	(% err)	235U	(% err)	206Pb*	(% err)	coef.		238U	(% err)	206Pb*	(% err)	coef.		238U	(abs)	235U	(abs)	206Pb	(abs)		238U	(abs)	206Pb	(abs)		% disc.i
131205M04, amphibolite
z1	11.097	2.05198	0.184913	0.469744		690.356	0.149865		0.0147615	0.150722	0.0986179	1.69055	0.0484752	1.63175	0.425843		0.0147754	0.150603	0.0484296	1.63196	0.424737		94.4632	0.141338	95.4997	1.54088	121.466	38.453		94.5515	0.141359	119.246	38.4739		22.2306
z2	6.7796	1.34391	0.198229	0.502955		425.739	0.16046		0.0147392	0.225188	0.0958627	2.68087	0.047192	2.61643	0.32386		0.0147529	0.224908	0.0471482	2.61673	0.322856		94.3218	0.210855	92.9501	2.38122	57.8835	62.3862		94.4088	0.210786	55.668	62.4194		-62.951
z3	3.2216	0.674354	0.209323	0.505122		211.878	0.161151		0.0147505	0.478471	0.0957171	6.35965	0.0470845	6.20154	0.363792		0.0147641	0.477591	0.0470409	6.20226	0.362858		94.3931	0.448353	92.8152	5.64098	52.442	148.012		94.48	0.447938	50.2281	148.09		-79.9954
z4	1.45336	0.2996	0.206143	0.427258		107.436	0.136311		0.0148046	0.944743	0.098864	11.8457	0.0484548	11.592	0.305454		0.0148188	0.942956	0.0484084	11.5933	0.304621		94.7368	0.888475	95.7272	10.8214	120.473	273.169		94.8269	0.887631	118.216	273.312		21.3629
z5	1.97979	0.528823	0.26711	0.433636		139.347	0.138351		0.0147095	0.807561	0.100677	8.06897	0.0496623	7.89894	0.258283		0.0147237	0.806285	0.0496146	7.89975	0.257559		94.1331	0.754659	97.4013	7.4941	178.168	184.17		94.223	0.754181	175.927	184.264		47.1662
z6	2.162	0.862761	0.399056	0.306757		155.263	0.0978748		0.0147299	0.52745	0.0993431	6.91064	0.0489363	6.79617	0.253257		0.0147449	0.526333	0.0488866	6.79681	0.252427		94.2628	0.493572	96.1698	6.34093	143.724	159.466		94.3578	0.49302	141.341	159.552		34.414
131205M05, plagioclase+amphibole dike
iz1	18.5545	26.3763	1.42156	0.397988		1164.45	0.126991		0.0144746	0.0871149	0.0957163	0.844989	0.0479813	0.824603	0.275505		0.014489	0.0871771	0.0479337	0.824706	0.274228		92.6407	0.0801267	92.8144	0.749495	97.283	19.5312		92.732	0.0802624	94.9331	19.5422		4.77197
iz2	86.0551	34.9928	0.406632	0.276853		5515.66	0.0883448		0.0144489	0.0604168	0.0957077	0.222069	0.0480624	0.193563	0.537839		0.0144641	0.0604869	0.048012	0.193645	0.536341		92.4773	0.055473	92.8064	0.196956	101.276	4.64231		92.5736	0.0555948	98.7965	4.64638		8.68828
iz3	89.121	33.146	0.371921	0.361529		5578.63	0.115359		0.0144838	0.0715265	0.0957543	0.226254	0.04797	0.19506	0.531187		0.0144984	0.071652	0.0479216	0.195174	0.52943		92.699	0.0658299	92.8497	0.200758	96.7235	4.6812		92.7918	0.066011	94.3365	4.68596		4.16081
z1	69.2661	35.0136	0.505493	0.431241		4257.97	0.1376		0.0144743	0.100113	0.0957952	0.27758	0.0480219	0.246836	0.451237		0.0144885	0.100223	0.0479749	0.246956	0.450071		92.6387	0.0920805	92.8875	0.246395	99.2834	5.89056		92.7287	0.0922701	96.9693	5.89593		6.6927
z2	94.8379	26.0232	0.274396	0.495989		5723.04	0.158253		0.0145032	0.063693	0.0959339	0.254283	0.0479956	0.230818	0.443748		0.014517	0.0640647	0.0479501	0.230973	0.440433		92.8224	0.0586978	93.0161	0.226014	97.9866	5.51642		92.9098	0.0590955	95.7446	5.52236		5.27031
z3	44.252	8.06659	0.182288	0.604012		2605.69	0.192711		0.0144962	0.0739876	0.0959136	0.479516	0.0480087	0.454357	0.393254		0.0145093	0.0744625	0.0479655	0.454508	0.389803		92.7778	0.0681525	92.9973	0.426125	98.632	10.7783		92.8607	0.0686507	96.5026	10.7861		5.93538
z4	96.9334	21.4408	0.221191	0.689039		5563.99	0.219831		0.0144994	0.0638664	0.0957697	0.25388	0.047926	0.226298	0.501303		0.0145119	0.0646513	0.0478848	0.226576	0.494463		92.7981	0.0588423	92.8639	0.225303	94.555	5.41402		92.8776	0.0596161	92.5139	5.42259		1.85802
z5	83.2038	23.3526	0.280667	0.465396		5064.54	0.148495		0.0144953	0.0561781	0.0958139	0.243206	0.0479618	0.22129	0.449024		0.0145092	0.0565527	0.0479157	0.221438	0.445197		92.7719	0.0517443	92.9049	0.215922	96.3224	5.29492		92.8605	0.0521387	94.0463	5.30064		3.68613
z6	15.4671	13.1685	0.851387	0.389836		976.056	0.12439		0.0144836	0.200429	0.0953822	1.1889	0.0477844	1.14637	0.290477		0.014498	0.200267	0.0477369	1.14651	0.289872		92.6973	0.184463	92.5048	1.05118	87.5424	27.1915		92.789	0.184495	85.1811	27.207		-5.88842
a All digestions carried out in Parr acid digestion vessels held at 210ºC for 48–72 hours.
b Ratio of radiogenic to common Pb.
c Total radiogenic Pb, common Pb and U (picograms).
d Th/U ratio calculated from 208Pb/206Pb and the 206Pb/238U date of the sample.
e Fractionation and spike corrected isotopic ratios, reduced using EARTHTIME ET535 tracer calibration v.3.
f Fractionation, spike, and blank corrected radiogenic isotope ratios. Laboratory blanks were corrected using 206Pb/204Pb = 18.416 ± 0.698, 207Pb/204Pb = 15.358 ± 0.452, 208Pb/204Pb = 37.461 ± 1.470.
g Correlation coefficient of radiogenic 207Pb*/235U and 206Pb*/238U.
h Dates (Ma) calculated using 238U/235U = 137.818 (Hiess et al., 2012), and decay constants of 238U = 1.5513 x 10-10 yr-1 and 235U = 9.8485 x 10-10 yr-1 (Jaffey et al., 1971).
i % discordance = 100 - (100 * (206Pb/238U date) / (207Pb/206Pb date))
